# Supplementary material for: Efficient fluoride adsorption by mesoporous hierarchical alumina microspheres
Source: Royal Society of Chemistry journal article supplement (doi:10.1039/c5ra27371d), 2016-01-01
Supplement: c5ra27371d1.pdf [file c5ra27371d1.pdf]

## **Efficient Fluoride Adsorption by mesoporous Hierarchical Alumina microspheres**

Sara Gràcia Lanas,<sup>a</sup> Manuel Valiente,<sup>b</sup> Eleonora Aneggi,<sup>a</sup> Alessandro Trovarelli,<sup>a</sup>  
Marilena Tolazzi<sup>a</sup> and Andrea Melchior<sup>a\*</sup>

<sup>a</sup>Dipartimento Politecnico, Laboratori di Tecnologie Chimiche, Università di Udine, via del  
Cotonificio 108, 33100 Udine, Italy

<sup>b</sup>Departamento de Química, Centre GTS, Universitat Autònoma de Barcelona, Campus Bellaterra  
Edificio CN, Barcelona, Spain

**Electronic Supplementary Material**

| Adsorbent  | Particle size distribution (DLS) ( $\mu\text{m}$ ) | Surface area ( $\text{m}^2 \text{g}^{-1}$ ) | Pore size (nm) | Pore volume ( $\text{cm}^3 \text{g}^{-1}$ ) | $\text{pH}_{\text{zpc}}$ |
|------------|----------------------------------------------------|---------------------------------------------|----------------|---------------------------------------------|--------------------------|
| HAM type A | 0.6 – 1.0                                          | 254.09                                      | 12.96          | 1.07                                        | 9.0                      |
| HAM type B | 1.5 – 2.6                                          | 241.62                                      | 25.55          | 2.32                                        | 9.0                      |

**Table S1.** Characteristics of HAM of type A and B

| Temperature (K) | Langmuir equation                        |                    |                 |       |           | Freundlich equation                     |                 |       |
|-----------------|------------------------------------------|--------------------|-----------------|-------|-----------|-----------------------------------------|-----------------|-------|
|                 | $Q_{\text{max}}$ ( $\text{mol g}^{-1}$ ) | $b(\text{M}^{-1})$ | $\log b$        | $R^2$ | $n$       | $K_f(\text{L mmol}^{-1} \text{g}^{-1})$ | $\log K_f$      | $R^2$ |
| 298.15          | $0.022 \pm 0.001$                        | $3308 \pm 646$     | $3.52 \pm 0.02$ | 0.997 | $4 \pm 1$ | $15 \pm 2$                              | $1.18 \pm 0.13$ | 0.883 |

**Table S2.** Langmuir and Freundlich isotherm parameters for fluoride adsorption by HAM type A obtained by using the batch method with 1h as contact time.

| Mono-exponential model |                           |       | Bi-exponential model |                           |           |                           |       |
|------------------------|---------------------------|-------|----------------------|---------------------------|-----------|---------------------------|-------|
| $a_1$ (M)              | $k_1$ ( $\text{h}^{-1}$ ) | $R^2$ | $a_1$ (M)            | $k_1$ ( $\text{h}^{-1}$ ) | $a_2$ (M) | $k_2$ ( $\text{h}^{-1}$ ) | $R^2$ |
| 7.0                    | 0.17                      | 0.905 | 9.5                  | 129.99                    | 6.4       | 0.15                      | 0.982 |

**Table S3.** Mono and bi-exponential parameters for the first-order kinetic model

| Adsorbent                       | Particle size | Initial F <sup>-</sup> (mM)                      | Adsorbent dosage (g L <sup>-1</sup> ) | pH  | Temperature (K) | Contact time (h) | Adsorption capacity (mmol g <sup>-1</sup> ) | <i>b</i> (M <sup>-1</sup> )           | $\Delta H$ (kJ mol <sup>-1</sup> ) | Ref.         |
|---------------------------------|---------------|--------------------------------------------------|---------------------------------------|-----|-----------------|------------------|---------------------------------------------|---------------------------------------|------------------------------------|--------------|
| Nanomagnetite graphite –La      | -             | 0.1 – 12.9<br>(1.97 - 244.6 mg L <sup>-1</sup> ) | 0.2                                   | 7.0 | 298             | 24               | 4.1<br>(77.12 mg g <sup>-1</sup> )          | 718.2<br>(0.038 L mg <sup>-1</sup> )  | 21.13                              | 20           |
| Mixed-phase nano iron oxides    | 50-200nm      | 0.5 – 5.3<br>(10 - 100 mg L <sup>-1</sup> )      | 1.2                                   | 7.0 | 298             | 8                | 2.8<br>(53.19 mg g <sup>-1</sup> )          | 1.1<br>(0.06 L g <sup>-1</sup> )      | -94.67                             | 68           |
| Bone char                       | -             | 0.1 – 1.1<br>(1 - 20 mg L <sup>-1</sup> )        | 1.0                                   | 5.0 | 298             | 120-168          | 0.4<br>(7.74 mg g <sup>-1</sup> )           | 29447.4<br>(1.55 L mg <sup>-1</sup> ) | -                                  | 69           |
| MgO microspheres                | -             | -                                                | 1.0                                   | 7.0 | 298             | 12               | 6.1<br>(115.5 mg g <sup>-1</sup> )          | 1481.9<br>(0.078 L mg <sup>-1</sup> ) | -                                  | 70           |
| Magnetic cationic hydrogel - La | -             | 0 – 4.2<br>(0 - 80 mg L <sup>-1</sup> )          | 0.3                                   | 7.0 | 298             | 0.17             | 7.9<br>(149.99 mg g <sup>-1</sup> )         | 7219.4<br>(0.38 L mg <sup>-1</sup> )  | -                                  | 71           |
| UiO-66-NH <sub>2</sub>          | 100nm         | 0.5 – 3.7<br>(10 - 70 mg L <sup>-1</sup> )       | 0.5                                   | -   | 293             | 2                | 3.1<br>(58.82 mg g <sup>-1</sup> )          | 6725.4<br>(0.354 L mg <sup>-1</sup> ) | -28.21                             | 72           |
| HAM type A                      | 900nm         | 2.0 - 16.0                                       | 0.5                                   | 5.5 | 298.15          | 12 <sup>a</sup>  | 55.0<br>(1.0 g g <sup>-1</sup> )            | 4820                                  | -                                  | Present work |
| HAM type A                      | 900nm         | 2.0 - 16.0                                       | 0.5                                   | 5.5 | 298.15          | 1 <sup>a</sup>   | 26.0<br>(491.4 mg g <sup>-1</sup> )         | 4563                                  | -17.7 ±0.6                         | Present work |
| HAM type B                      | 900nm         | 2.0 - 16.0                                       | 0.5                                   | 5.5 | 298.15          | 1 <sup>a</sup>   | 20.4<br>(385.6 mg g <sup>-1</sup> )         | 598                                   | -13.3 ±0.9                         | Present work |

**Table S4.** Fluoride removal parameters for several absorbing materials (data relative to the HAM prepared in this work are also recalled for comparison). In parentheses the original values reported in the references. <sup>a</sup>Delay time between fluoride solution additions.

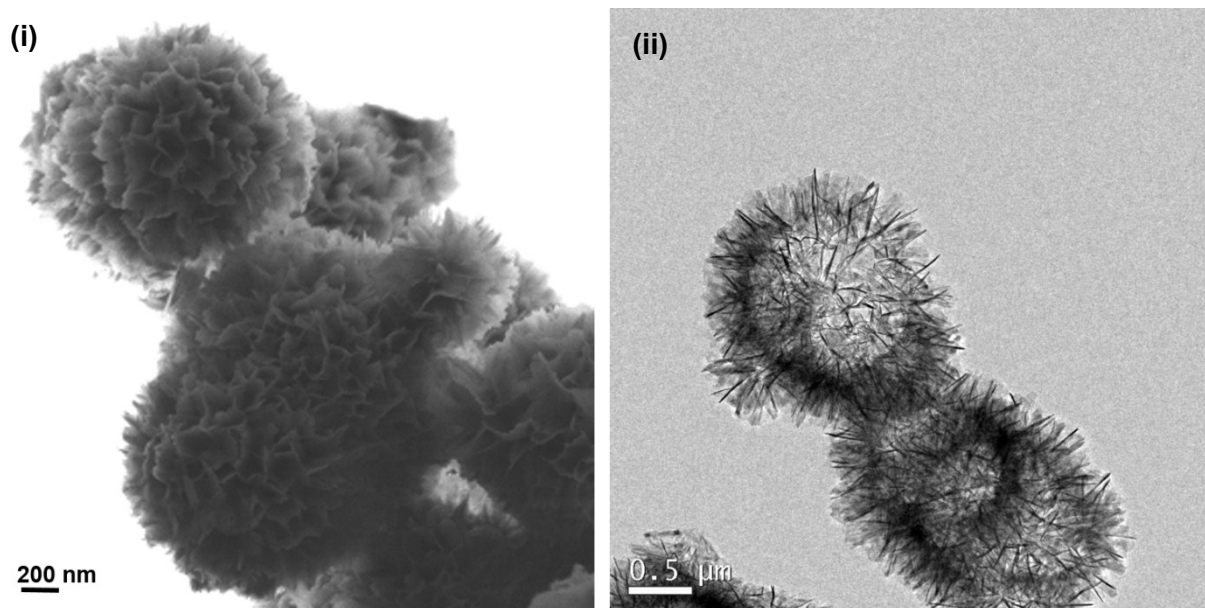

**Figure S1.** SEM (i) TEM (ii) images of synthesized type B HAM, before calcination process.

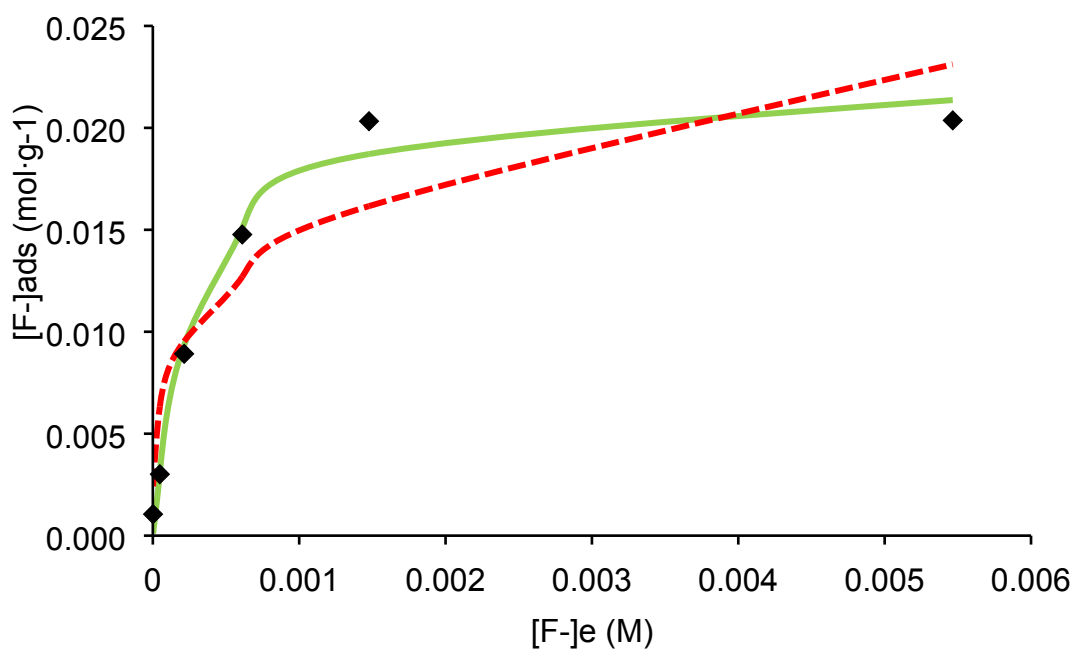

**Figure S2.** Experimental fluoride adsorption data (batch method) fitted with Langmuir (green line) and Freundlich (dashed red line) models with 1h of contact time (type A sample).

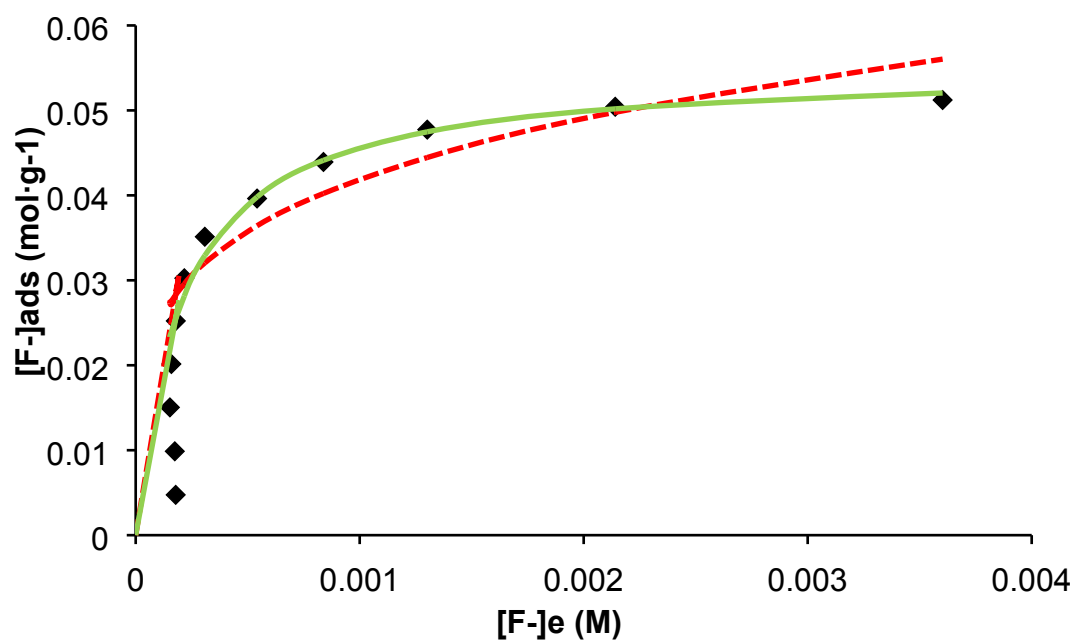

**Figure S3.** Fluoride adsorption data fitted with Langmuir (green line) and Freundlich (dashed red line) models with 12h delay between injections (type A sample).
